# Supplementary material
Source: PubMed Central journal article supplement (PMC6312854)
Supplement: NIHMS1508746-supplement-2.pdf [file NIHMS1508746-supplement-2.pdf]

## Reporting Summary

Nature Research wishes to improve the reproducibility of the work that we publish. This form provides structure for consistency and transparency in reporting. For further information on Nature Research policies, see [Authors & Referees](#) and the [Editorial Policy Checklist](#).

### Statistical parameters

When statistical analyses are reported, confirm that the following items are present in the relevant location (e.g. figure legend, table legend, main text, or Methods section).

n/a Confirmed

- The exact sample size ( $n$ ) for each experimental group/condition, given as a discrete number and unit of measurement
- An indication of whether measurements were taken from distinct samples or whether the same sample was measured repeatedly
- The statistical test(s) used AND whether they are one- or two-sided  
*Only common tests should be described solely by name; describe more complex techniques in the Methods section.*
- A description of all covariates tested
- A description of any assumptions or corrections, such as tests of normality and adjustment for multiple comparisons
- A full description of the statistics including central tendency (e.g. means) or other basic estimates (e.g. regression coefficient) AND variation (e.g. standard deviation) or associated estimates of uncertainty (e.g. confidence intervals)
- For null hypothesis testing, the test statistic (e.g.  $F$ ,  $t$ ,  $r$ ) with confidence intervals, effect sizes, degrees of freedom and  $P$  value noted  
*Give  $P$  values as exact values whenever suitable.*
- For Bayesian analysis, information on the choice of priors and Markov chain Monte Carlo settings
- For hierarchical and complex designs, identification of the appropriate level for tests and full reporting of outcomes
- Estimates of effect sizes (e.g. Cohen's  $d$ , Pearson's  $r$ ), indicating how they were calculated
- Clearly defined error bars  
*State explicitly what error bars represent (e.g. SD, SE, CI)*

*Our web collection on [statistics for biologists](#) may be useful.*

### Software and code

Policy information about [availability of computer code](#)

Data collection

<https://github.com/mgolkaram/Nature-Neuroscience-2018-miRNA-mRNA-paper> , protocol 100-6667 at <http://www.fluidigm.com/>

Data analysis

<https://github.com/mgolkaram/Nature-Neuroscience-2018-miRNA-mRNA-paper> , Geneious® bioinformatics platform (version 9.1.8), <http://www.novocraft.com/>). Fluidigm Real-Time PCR Analysis Software (v.3.0.2), miRdeep2, DESeq2, R version 3.3.1 (2016-06-21)

For manuscripts utilizing custom algorithms or software that are central to the research but not yet described in published literature, software must be made available to editors/reviewers upon request. We strongly encourage code deposition in a community repository (e.g. GitHub). See the Nature Research [guidelines for submitting code & software](#) for further information.

### Data

Policy information about [availability of data](#)

All manuscripts must include a [data availability statement](#). This statement should provide the following information, where applicable:

- Accession codes, unique identifiers, or web links for publicly available datasets
- A list of figures that have associated raw data
- A description of any restrictions on data availability

The data used in this study are available as part of the publicly available Gene Expression Omnibus database under the accession number GSE107468.

## Field-specific reporting

Please select the best fit for your research. If you are not sure, read the appropriate sections before making your selection.

Life sciences  Behavioural & social sciences  Ecological, evolutionary & environmental sciences

For a reference copy of the document with all sections, see [nature.com/authors/policies/ReportingSummary-flat.pdf](https://www.nature.com/authors/policies/ReportingSummary-flat.pdf)

## Life sciences study design

All studies must disclose on these points even when the disclosure is negative.

|                 |                                                                                                                                                                                                                                                                                                                                                                                                                                |
|-----------------|--------------------------------------------------------------------------------------------------------------------------------------------------------------------------------------------------------------------------------------------------------------------------------------------------------------------------------------------------------------------------------------------------------------------------------|
| Sample size     | We generated data based on the availability of primary tissue samples. In total we processed 9 primary tissue samples for AGO2-clip, and used saturation analysis to determine that this number was effective in recovering the majority of targeted genes.                                                                                                                                                                    |
| Data exclusions | For single cell qPCR we excluded any assay that did not give positive value after 30 cycles of amplification in at least two single cells. We removed cells with positive signal from at least 5 assays.                                                                                                                                                                                                                       |
| Replication     | We used strict measures to highlight high confidence AGO2 binding clusters in the mRNA. Firstly, we used multiple biological replicates for each age-range of specimens and curated the dataset to the list of target sites detected in at least two biological specimens. For all other experiments that were carried out, all attempts at replication were successful.                                                       |
| Randomization   | Samples were randomized due to the random collection of primary tissue specimens and were processed in random order. Sc-qPCR data was generated and processed in random order.                                                                                                                                                                                                                                                 |
| Blinding        | Sample collection was performed by researchers at UCSF, the samples were processed for AGO2-CLIP at UCSB without cross-referencing with sample metadata. For single cell qPCR, m data was processed in parallel and only analyzed together following a melting curve analysis. miR2115 overexpression analysis and brdU analysis experiment was performed by blinding the experimental conditions for brdu/sox2 quantification |

## Reporting for specific materials, systems and methods

### Materials & experimental systems

|                                     |                                                                 |
|-------------------------------------|-----------------------------------------------------------------|
| n/a                                 | Involvement in the study                                        |
| <input checked="" type="checkbox"/> | <input type="checkbox"/> Unique biological materials            |
| <input checked="" type="checkbox"/> | <input type="checkbox"/> Antibodies                             |
| <input type="checkbox"/>            | <input checked="" type="checkbox"/> Eukaryotic cell lines       |
| <input checked="" type="checkbox"/> | <input type="checkbox"/> Palaeontology                          |
| <input type="checkbox"/>            | <input checked="" type="checkbox"/> Animals and other organisms |
| <input checked="" type="checkbox"/> | <input type="checkbox"/> Human research participants            |

### Methods

|                                     |                                                 |
|-------------------------------------|-------------------------------------------------|
| n/a                                 | Involvement in the study                        |
| <input checked="" type="checkbox"/> | <input type="checkbox"/> ChIP-seq               |
| <input checked="" type="checkbox"/> | <input type="checkbox"/> Flow cytometry         |
| <input checked="" type="checkbox"/> | <input type="checkbox"/> MRI-based neuroimaging |

## Eukaryotic cell lines

Policy information about [cell lines](#)

|                                                                      |                                                                                                                                                             |
|----------------------------------------------------------------------|-------------------------------------------------------------------------------------------------------------------------------------------------------------|
| Cell line source(s)                                                  | HEK293 cells were obtained from a commercial source.                                                                                                        |
| Authentication                                                       | This cell line was never authenticated                                                                                                                      |
| Mycoplasma contamination                                             | We have not tested this line for mycoplasma contamination                                                                                                   |
| Commonly misidentified lines<br>(See <a href="#">ICLAC</a> register) | We used the HEK293 cell line and there was no particular reason for choosing it, other than that it is commonly used in the lab for luciferase experiments. |

## Animals and other organisms

Policy information about [studies involving animals](#); [ARRIVE guidelines](#) recommended for reporting animal research

|                    |                                                                                                                                                                                                                                             |
|--------------------|---------------------------------------------------------------------------------------------------------------------------------------------------------------------------------------------------------------------------------------------|
| Laboratory animals | We have pregnant dams Swiss-Webster in this experiment, but only analyzed embryonic animals. We never test embryos for sex. therefore we expect approximately even representation of males and females. We used three pregnant dams in this |
|--------------------|---------------------------------------------------------------------------------------------------------------------------------------------------------------------------------------------------------------------------------------------|

experiments. Because Simonsen does not inform us about the age of these animals, we do not know what ages they are. The embryos used in the analysis were at E15.5 stage of development. However, we did not confirm the age by Theiler criteria, and the age is only based on the plug check information provided by Simonsen.

Wild animals

this study did not involve wild animals

Field-collected samples

this study did not involve field-collected animals
